# Supplementary material
Source: PubMed Central journal article supplement (PMC2877955)
Supplement: JCI42002sd.pdf [file JCI42002sd.pdf]

# SUPPLEMENTAL DATA

Eyles et al.

**TABLE S1: Percent of conservation:** Each tumor (reference) was compared against every other tumor (tested) from the same or different mouse. The percentage of mutations in the reference tumor that were shared with the tested tumor was averaged for each mouse pair.

|                  |                | <b>Tested in</b> |                |                |                |                |
|------------------|----------------|------------------|----------------|----------------|----------------|----------------|
|                  |                | <b>Mouse 1</b>   | <b>Mouse 2</b> | <b>Mouse 3</b> | <b>Mouse 4</b> | <b>Mouse 5</b> |
| <b>Reference</b> | <b>Mouse 1</b> | 34.85            | 0.00           | 17.51          | 1.52           | 0.00           |
|                  | <b>Mouse 2</b> | 0.00             | 48.33          | 0.74           | 3.89           | 1.11           |
|                  | <b>Mouse 3</b> | 9.28             | 0.07           | 31.49          | 1.70           | 0.97           |
|                  | <b>Mouse 4</b> | 5.98             | 4.38           | 10.99          | 17.47          | 5.07           |
|                  | <b>Mouse 5</b> | 0.00             | 1.33           | 8.89           | 12.78          | 0.00           |

**TABLE S2: Tissue origin of tumors**

|                |                       |
|----------------|-----------------------|
| Mouse 1        | Mouse 4               |
| LE Left eye    | LE Left eye           |
| T1 Right cheek | RE Right eye          |
| T2 Leg muscle  | T1 Flank muscle       |
| T3 Neck        | T2 Neck               |
| Mouse 2        | T3 Right cheek        |
| LE Left eye    | T4 Flank muscle       |
| RE Right eye   | T5 Tail               |
| T1 Back skin   | T6 Peritoneum         |
| T2 Cheek       | T7 Reproductive tract |
| T3 Skin        | Mouse 5               |
| T4 Peritoneum  | T1 Left cheek         |
| T5 Knee        | T2 Left cheek         |
| T6 Shoulder    | T3 Dorsal skin        |
| T7 Left ear    | T4 Left knee          |
| Mouse 3        | T5 Right knee         |
| LE Left eye    | T6 Flank muscle       |
| RE Right eye   | T7 Neck               |
| T1 Skin        | T8 Neck               |
| T2 Ear         | T9 Neck               |
| T4 Cheek       | T10 Neck              |
| T5 Cheek       | T11 Neck              |
| T7 Muscle      | T12 Rectum            |
| T8 Neck        | T13 Mediastinum       |
| T9 Neck        |                       |

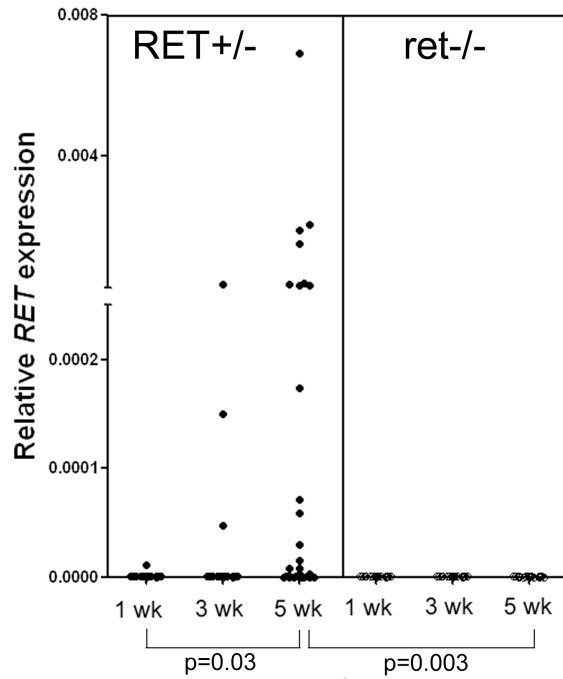

## Supplemental Figure S1

### **Supplemental Figure S1: Tumor cell dissemination to internal organs starts at 3 weeks of age.**

RET expression was measured by qRT-PCR in the lymph nodes, lungs, heart, kidney, liver, stomach, colon, bone marrow, thymus, bladder and small intestine (n = 11 organs per mouse) collected from RET.AAD (RET+/-) mice aged 1 week (n = 3), 3 weeks (n = 3) and 5 weeks (n = 4). Eleven age-matched non-transgenic littermates (ret-/-) were used as controls.

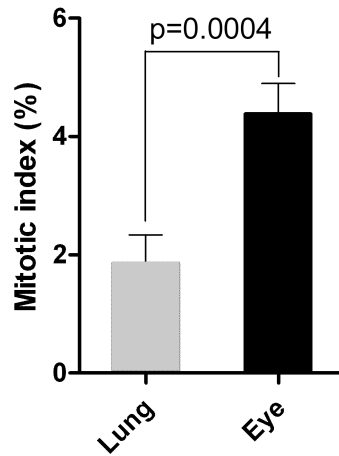

## Supplemental Figure S2

**Supplemental Figure S2: Eye metastases have a higher mitotic index compared to lung tumors.**

Percentage of proliferating tumor cells (S100B+ Ki-67+) in eye and lung tumors. Data are from 12 eyes and 17 lungs from 22 mice, representing a total of 103 tumors. Data represent mean  $\pm$  SEM.

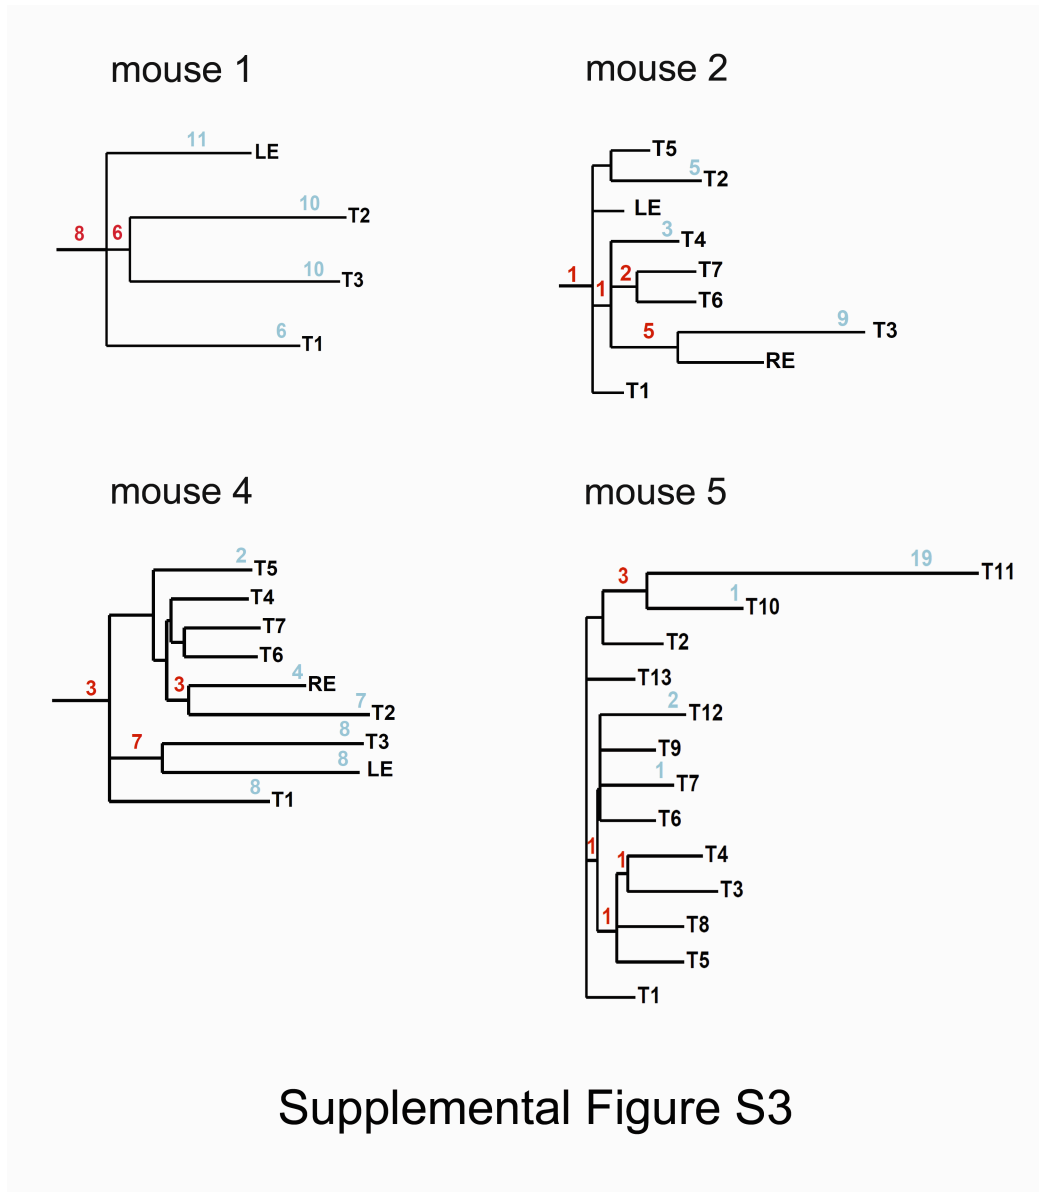

**Supplemental Figure S3: Phylograms of tumors from individual RET.AAD mice.**

The number of mutations conserved along each horizontal branch is indicated in red. The number of mutations unique to each tumor is shown in blue. LE and RE refer to the left and right eye tumor respectively. Tumor tissue origins are given in Supplemental Table S2.

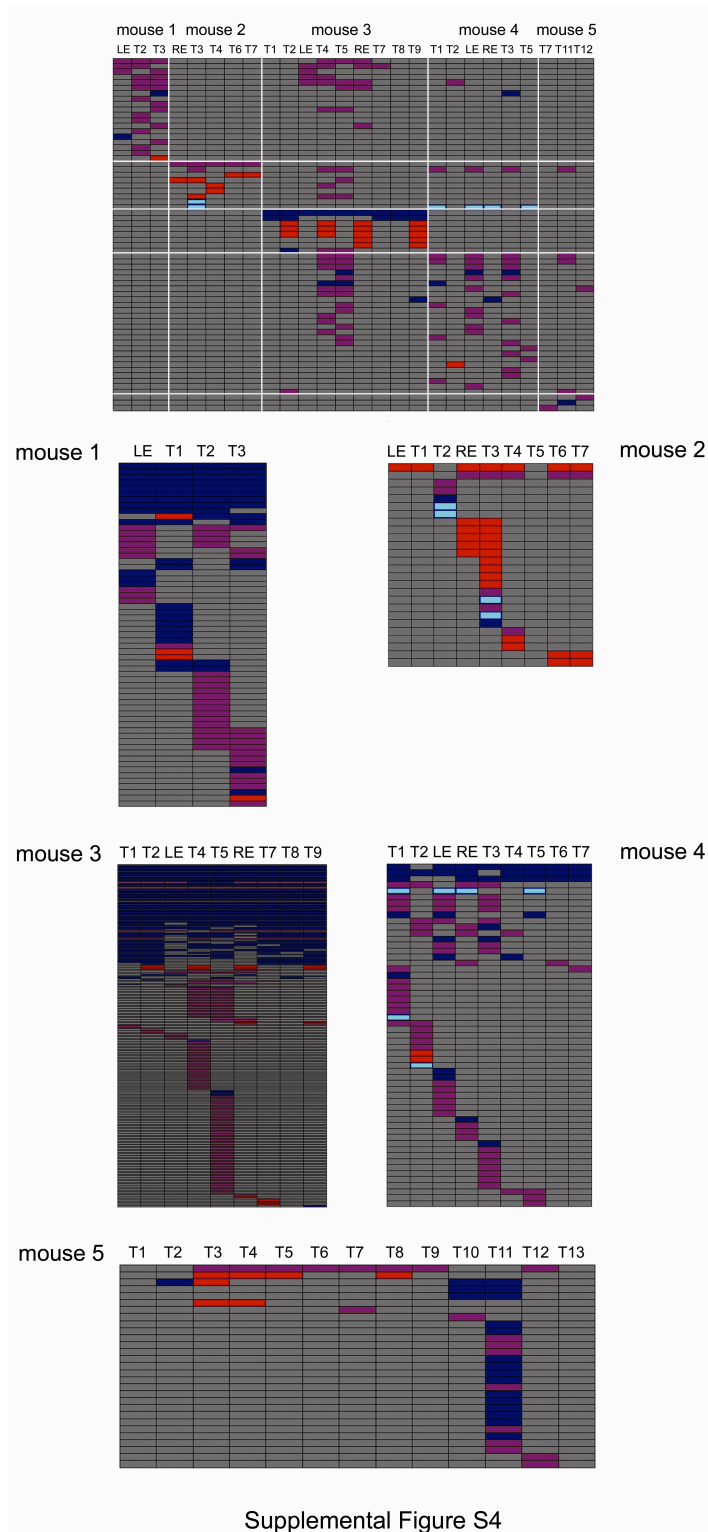

**Supplemental Figure S4:** Genetic alterations identified by comparing the SNP genotypes of each tumor against the tail sample (germline sequence) from the same mouse. Allelic losses and copy number losses are shown in dark and light blue respectively, point mutations and copy number gains are in violet and red, respectively. Top panel shows the heatmap used for cluster analysis in Figure 3A while the other panels show the heatmaps used for individual phylograms shown in Figure 3C and Supplemental Figure S3. Tumor origins are given in Supplemental Table S2.
